# Supplementary material for: Partial oxidation of methane to formaldehyde over copper–molybdenum complex oxide catalysts
Source: Royal Society of Chemistry journal article supplement (doi:10.1039/d1cy00511a), 2021-01-01
Supplement: d1cy00511a2.pdf [file d1cy00511a2.pdf]

## Supporting information

# **Partial oxidation of methane to formaldehyde over cupper-molybdenum complex oxide catalysts**

Taiki Akiyama, Ryota Sei, Sakae Takenaka\*

Graduate School of Science and Engineering, Department of Applied Chemistry,  
Doshisha University, 1-3 Tatara-Miyakodani, Kyotanabe, Kyoto 610-0321, Japan

E-mail: [stakenak@mail.doshisha.ac.jp](mailto:stakenak@mail.doshisha.ac.jp)

Table S1 Methane oxidation over various Cu-based complex oxide (Cu-MO<sub>x</sub>) catalysts (M = V, Cr, Mn, Fe, Mo, Ta, Cu/M = 1/1 as mole ratio). Catalyst = 0.050 g, flow rate = 70 mL min<sup>-1</sup>,  $P(\text{CH}_4) = 14.5 \text{ kPa}$ ,  $P(\text{O}_2) = 14.5 \text{ kPa}$ ,  $P(\text{H}_2\text{O}) = 14.5 \text{ kPa}$ . These reactants were diluted with He.

| catalyst            | temp. [°C] | CH <sub>4</sub> Conversion [%] | selectivity [%] |       |                 |                               |                               |
|---------------------|------------|--------------------------------|-----------------|-------|-----------------|-------------------------------|-------------------------------|
|                     |            |                                | HCHO            | CO    | CO <sub>2</sub> | C <sub>2</sub> H <sub>6</sub> | C <sub>2</sub> H <sub>4</sub> |
| Cu-VO <sub>x</sub>  | 650        | 0.7                            | 18              | 7     | 75              | trace                         | 0                             |
|                     | 700        | 2.5                            | 21              | 13    | 66              | trace                         | trace                         |
| Cu-CrO <sub>x</sub> | 600        | 3.6                            | 1               | 0     | 99              | 0                             | 0                             |
|                     | 650        | 8.3                            | 1               | 0     | 99              | 0                             | 0                             |
| Cu-MnO <sub>x</sub> | 600        | 2.2                            | 1               | 0     | 99              | 0                             | 0                             |
|                     | 650        | 2.9                            | 5               | trace | 95              | 0                             | 0                             |
| Cu-FeO <sub>x</sub> | 600        | 2.6                            | trace           | 0     | 100             | 0                             | 0                             |
|                     | 650        | 4.1                            | trace           | 0     | 100             | 0                             | 0                             |
| Cu-MoO <sub>x</sub> | 650        | 0.3                            | 100             | 0     | 0               | 0                             | 0                             |
|                     | 700        | 1.0                            | 78              | 17    | 5               | 0                             | 0                             |
| Cu-TaO <sub>x</sub> | 550        | 0.8                            | 2               | 0     | 98              | 0                             | 0                             |
|                     | 600        | 5.5                            | trace           | 0     | 100             | 0                             | 0                             |

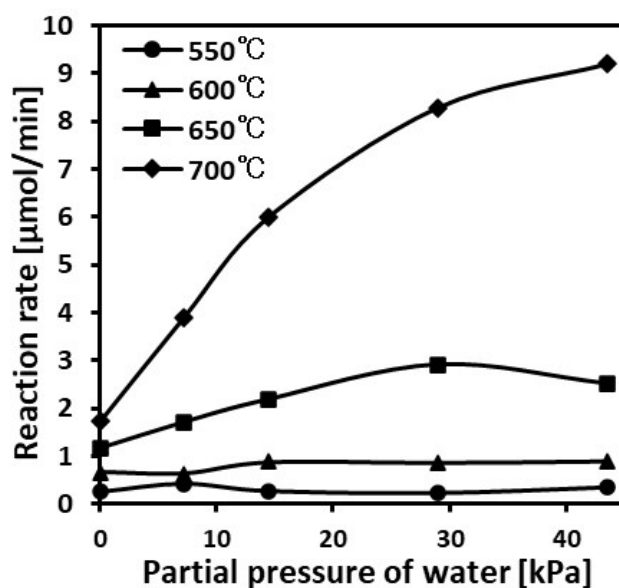

Fig. S1 Change of the oxidation rate of methane with partial pressures of water in the oxidation of methane over Cu-MoO<sub>x</sub> (65%) catalysts. Catalyst = 0.050 g, flow rate = 70 mL min<sup>-1</sup>,  $P(\text{CH}_4) = 14.5 \text{ kPa}$ ,  $P(\text{O}_2) = 14.5 \text{ kPa}$ . These reactants were diluted with He.

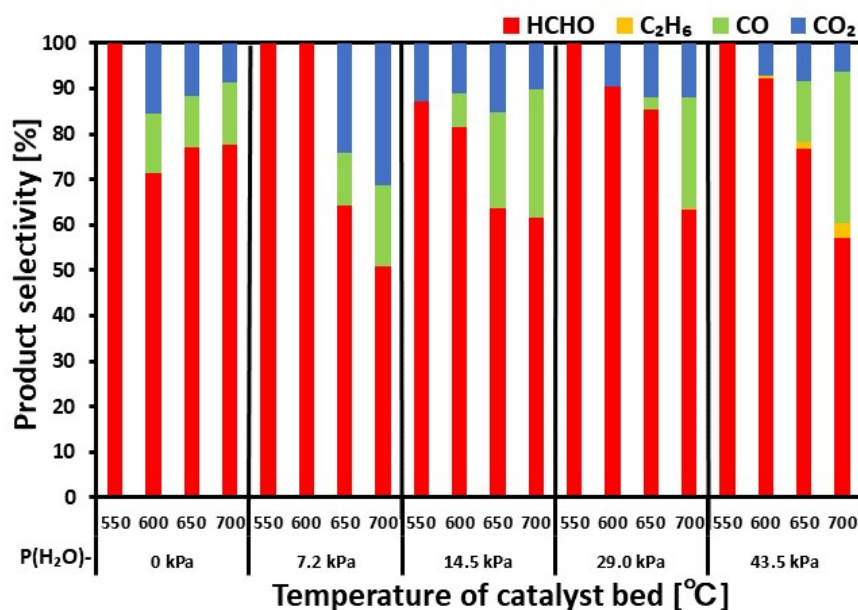

Fig. S2 Product selectivity at each temperature in the oxidation of methane over Cu-MoO<sub>x</sub> (65%) catalysts with different partial pressure of water. Catalyst = 0.050 g, flow rate = 70 mL min<sup>-1</sup>,  $P(\text{CH}_4) = 14.5 \text{ kPa}$ ,  $P(\text{O}_2) = 14.5 \text{ kPa}$ . These reactants were diluted with He.

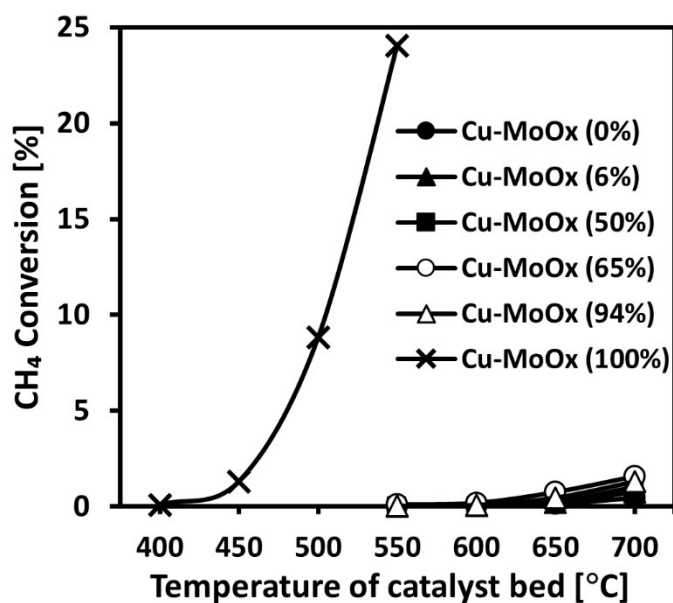

Fig. S3 Change of methane conversion against reaction temperature in the oxidation of methane over Cu-MoO<sub>x</sub> catalysts with different Cu loadings. Catalyst = 0.050 g, flow rate = 70 mL min<sup>-1</sup>,  $P(\text{CH}_4) = 14.5 \text{ kPa}$ ,  $P(\text{O}_2) = 14.5 \text{ kPa}$ ,  $P(\text{H}_2\text{O}) = 14.5 \text{ kPa}$ . These reactants were diluted with He.

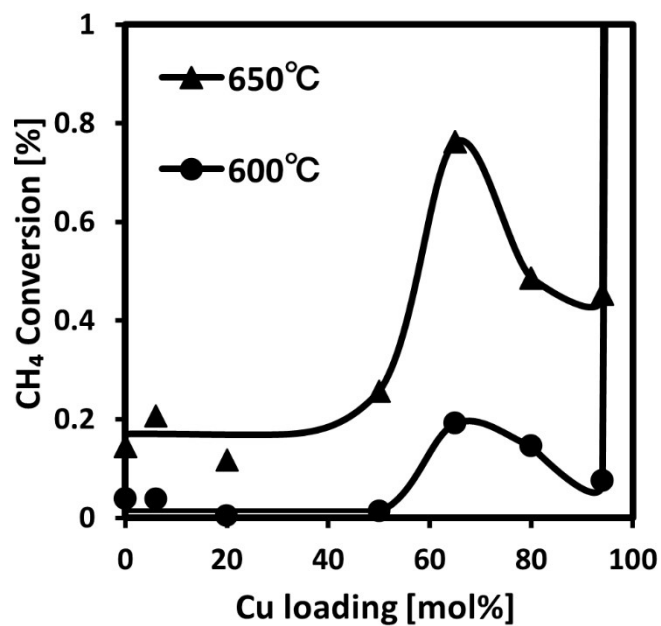

Fig. S4 Change of methane conversion with Cu loading in the Cu-MoO<sub>x</sub> catalysts in the oxidation of methane in the presence of water vapor at 600 and 650°C. Catalyst = 0.050 g, flow rate = 70 mL min<sup>-1</sup>,  $P(\text{CH}_4) = 14.5$  kPa,  $P(\text{O}_2) = 14.5$  kPa,  $P(\text{H}_2\text{O}) = 14.5$  kPa. These reactants were diluted with He.
